# Supplementary figures and images for: Molecular identification of tick (Acari: Ixodidae) and tick-borne pathogens from Przewalski's gazelle (Procapra Przewalskii) and Tibetan sheep (Ovis aries) in Qinghai Lake National Nature Reserve, China
Source: PubMed Central journal article supplement — Heliyon. 2024 Nov 13;10(23):e40205. doi: 10.1016/j.heliyon.2024.e40205 (PMC11666992; doi:10.1016/j.heliyon.2024.e40205), 2024-11-13

M A a B b C c D d E e F f G g H h I i J j K k

2000  
1000  
750  
500  
250  
100

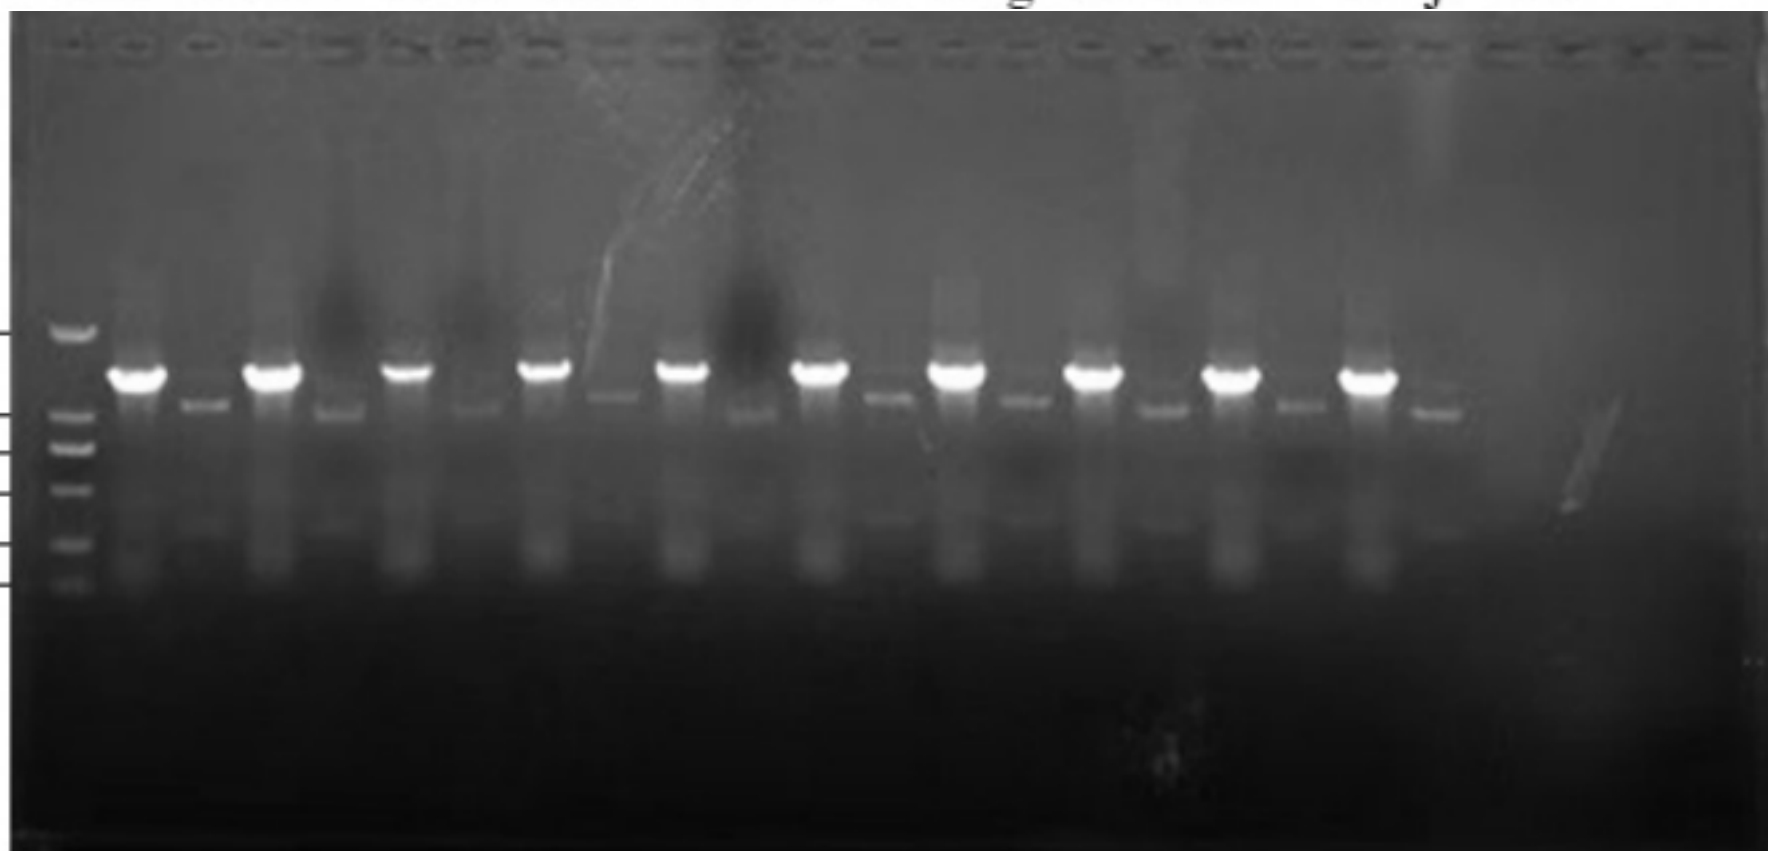

Supplement: mmc1.pdf [file mmc1.pdf]
